# Supplementary material
Source: PubMed Central journal article supplement (PMC5824853)
Supplement: jci-128-94996-s001.pdf [file jci-128-94996-s001.pdf]

1 **Supplementary Appendix**

2

3 **Table of Contents**

4

5 **Figures:**

6 **Supplemental Figure 1:** Nisoldipine Concentration-Response Relationship on iPSC-  
7 CMs

8

9 **Supplemental Figure 2:** Exome Sequencing Prioritization Strategy

10

11 **Supplemental Figure 3:** siRNA mediated knockdown of *KCNK17* and *REM2* Transcript

12

13 **Supplemental Figure 4:** Effect of *REM2* siRNA on APD and  $I_{CaL}$  in patient derived  
14 iPSC-CM.

15

16 **Supplemental Figure 5:** Immunohistochemistry of canonical cardiac markers in patient  
17 derived iPSC-CM

18

19 **Tables:**

20

21 **Supplemental Table 1:** Cleveland LQT2 Family Summary Statistics

22

23 **Supplemental Table 2:** Phenotype Details from All 26 hERG R752W Mutation-Positive  
24 Individuals from Cleveland LQT2 Family

25

26 **Supplemental Table 3:** Comprehensive Action Potential Characteristics from Patient  
Specific iPSC-CMs

27

28 **Supplemental Table 4:** Summary data of action potential and  $I_{CaL}$  characteristics from  
patient specific iPSC-CMs - and + Nisoldipine treatment.

29

29 **Supplemental Table 5:** Exome Sequencing Gene Candidates

30

31 **Supplemental Table 6:** Additional Action Potential Characteristics from Effects of  
*KCNK17* siRNA on iCells®

32

33 **Supplemental Table 7:** Summary data of action potential and  $I_{CaL}$  characteristics from  
patient specific iPSC-CMs - and + *REM2* siRNA.

34

35 **Supplemental Table 8:** Summary data of action potential and  $I_{CaL}$  characteristics from  
IV-3 patient iPSC-CM - and + CRISPR-Cas9 genome editing.

36

37

38

39

40

41

42

43

44

45

46

47

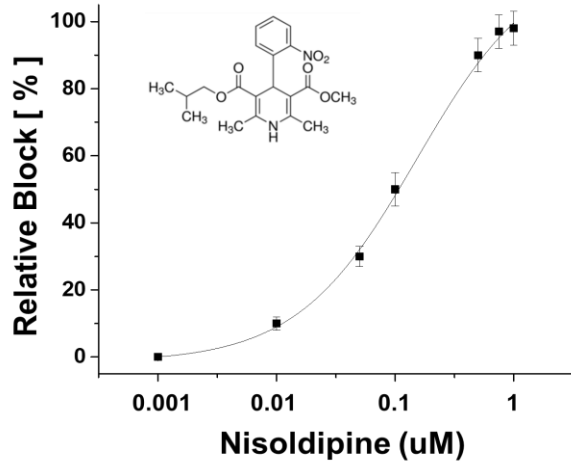

1

2 **Supplemental Figure 1. Concentration-Response Relationship for Nisoldipine on**  
3 **iPSC-CMs.** Concentration-response relationship for the effect of nisoldipine (Ca<sub>v</sub>1.2  
4 blocker) on I<sub>CaL</sub> (L-type Ca<sup>2+</sup> channel) was measured at -10 mV (between 3-7 cells,  
5 mean±SEM). EC<sub>50</sub> value yielded 150 nM. Inset: structural schematic of nisoldipine.

6

7

## Exome Sequencing Prioritization Strategy

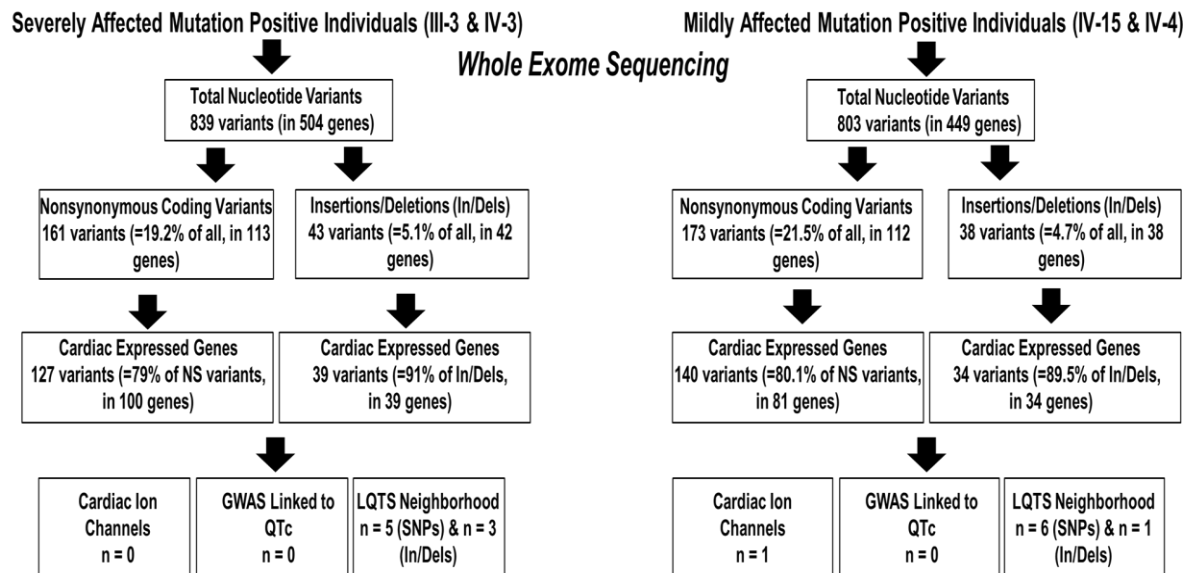

1

2 **Supplemental Figure 2.** Exome Sequencing Prioritization Strategy. Four patients were

3 exome sequenced (two in each group: IV-15 and IV-4 in the mildly affected and III-3 and

4 IV-3 in the severely affected). The severely affected hERG R752W mutation-positive

5 and mildly affected mutation-positive individuals were filtered looking for variants in

6 genes exclusive to each cohort. Total coding variants describes all synonymous,

7 nonsynonymous, and frameshift-inducing insertions or deletions as well as canonical

8 splice site variants within captured exons (but does not include 5' or 3' untranslated

9 regions and introns). From this group we filtered first for only nonsynonymous coding

10 variants (i.e. variants resulting in an amino acid substitution) or for Insertion/Deletion.

11 Next, we filtered for genes specific to cardiac tissue. Then, we filtered for cardiac ion

12 channels or genes that were cross listed in the LQTS Neighborhood(22) or linked by

13 GWAS to QT interval modulation(18, 19, 21).

14

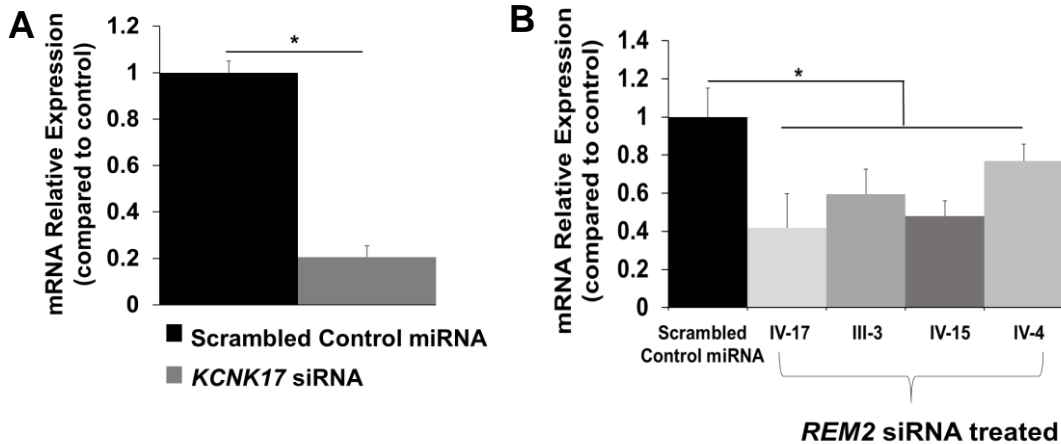

1

2 **Supplemental Figure 3. siRNA knockdown of *KCNK17* and *REM2*.** Panel A shows  
 3 qPCR data of iCell® cardiomyocytes transfected with either scrambled control siRNA or  
 4 *KCNK17* siRNA revealed ~5 fold knockdown of *KCNK17* transcript in the siRNA group.  
 5 Panel B shows between ~1.3-2.4 fold knockdown of *REM2* transcript in 4 patient  
 6 derived iPSC-CM lines in the siRNA treated group compared to scrambled control. \*  
 7 denotes  $p < 0.05$  with unpaired Student's t-test used to assess significance in Panel A  
 8 and ANOVA in Panel B.

9

10

11

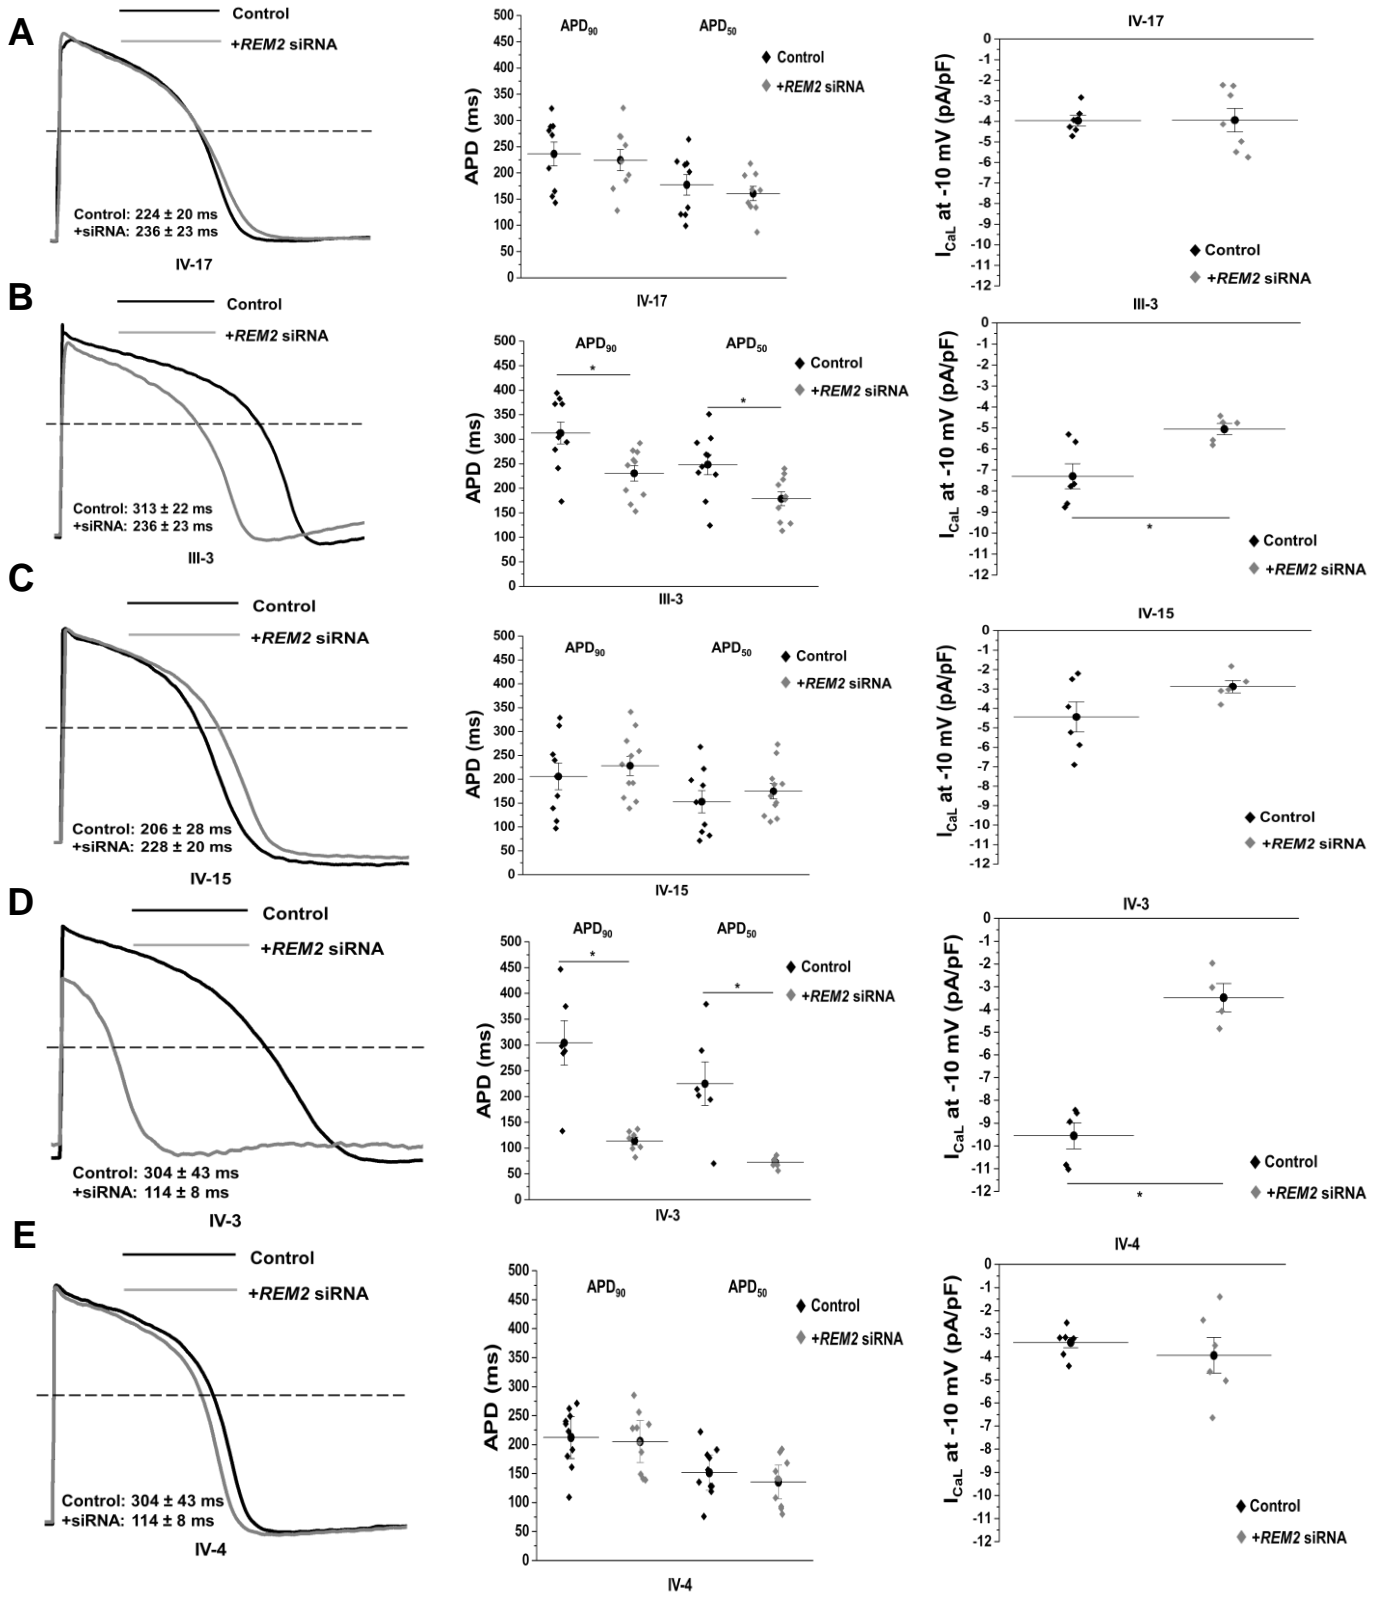

1

2

1 **Supplemental Figure 4. Effect of *REM2* siRNA on APD and  $I_{CaL}$  in patient derived**  
2 **iPSC-CM.** Panels A-E illustrate the effects of *REM2* siRNA on both patient iPSC-CM  
3 trios (IV-17, III-3, IV-15 and IV-17, IV-3 and IV-4). Data is depicted as macroscopic  
4 action potential recording, APD summary data, and  $I_{CaL}$  comparison between scrambled  
5 control and *REM2* siRNA. Between 6-11 cells were analyzed in the effects of *REM2*  
6 siRNA on APD and 5-7 cells for the effects of *REM2* siRNA on  $I_{CaL}$  in Panels A-E.  
7 Please refer to Supplemental Table 7 for numbers of replicate measures (n) and  
8 statistical analysis.

9

10

11

12

13

14

15

16

17

18

19



1 **Supplemental Tables**

---

| <b>Cleveland LQT2 Family</b>                                                                          |                                                                       |
|-------------------------------------------------------------------------------------------------------|-----------------------------------------------------------------------|
| Number of Family Members Enrolled in LQT2 Study                                                       | n = 101                                                               |
| Number of hERG R752W Mutation Positive Individuals                                                    | n = 26 (26%, No. of Mutation Positive/No. of Enrolled Family Members) |
| Sex Distribution Amongst 26 hERG R752W Mutation Positive Individuals                                  | Females (n = 12, 46%)<br>Males (n = 14, 54%)                          |
| Average Age of ECG & Genotyping / QTc ± stdev (males) from hERG R752W Mutation Positive Individuals   | 29 / 438 ± 23                                                         |
| Average Age of ECG & Genotyping / QTc ± stdev (females) from hERG R752W Mutation Positive Individuals | 34 / 481 ± 32                                                         |

---

2

3 **Supplemental Table 1. Cleveland LQT2 Family Summary Statistics.**

4

5

6

7

8

9

10



| Generation | Family Member Number | Sex | Phenotype |
|------------|----------------------|-----|-----------|
|------------|----------------------|-----|-----------|

|            |              |          |                          |
|------------|--------------|----------|--------------------------|
| <b>III</b> | 1            | F        | Severely affected        |
|            | 2            | F        | Mildly affected          |
|            | 3            | M        | Mildly affected          |
|            | <b>4</b>     | <b>M</b> | <b>Severely affected</b> |
|            | 5 (deceased) | M        | Mildly affected          |

|           |          |          |                          |
|-----------|----------|----------|--------------------------|
| <b>IV</b> | 1        | F        | Mildly affected          |
|           | 2        | M        | Mildly affected          |
|           | 3        | M        | Mildly affected          |
|           | 4        | F        | Mildly affected          |
|           | 5        | M        | Mildly affected          |
|           | <b>6</b> | <b>F</b> | <b>Severely affected</b> |
|           | <b>7</b> | <b>F</b> | <b>Mildly affected</b>   |
|           | 8        | F        | Mildly affected          |
|           | <b>9</b> | <b>M</b> | <b>Mildly affected</b>   |
|           | 10       | F        | Mildly affected          |
|           | 12       | F        | Mildly affected          |
|           | 13       | M        | Mildly affected          |
|           | 13       | M        | Mildly affected          |
|           | 14       | M        | Mildly affected          |
|           | 15       | F        | Mildly affected          |

|          |   |   |                 |
|----------|---|---|-----------------|
| <b>V</b> | 1 | F | Mildly affected |
|          | 2 | M | Mildly affected |
|          | 3 | F | Mildly affected |
|          | 4 | M | Mildly affected |
|          | 5 | M | Mildly affected |
|          | 6 | M | Mildly affected |
|          | 7 | M | Mildly affected |

1 **Supplemental Table 2.** Phenotype Details from All 26 living hERG R752W Mutation-  
2 Positive Individuals from Cleveland LQT2 Family. This table shows all 26 mutation-  
3 positive family members distributed across three generations involved in the study (and  
4 1 deceased, Gen III, #5). Rows shaded in dark grey with bold font are the original 4  
5 family members characterized by iPSC-CM and exome sequencing in the main text.

1 The light shaded grey rows indicate additional mutation carriers in the family that were  
2 additionally genotyped for *REM2* and *KCNK17*. Non-shaded rows are mutation carriers  
3 that remain uncharacterized. *Note:* these Generation + Family Member Number  
4 identifiers do not correspond to those in Figure 1 because for conciseness Figure 1 is a  
5 zoomed-in snapshot of the family pedigree and thus uses its own numbering system.  
6 Here in this table we are showing all the hERG R752W mutation carriers in the family  
7 starting from the first individual in each generation.

8

| iPSC-CM Background        | n   | APD <sub>90</sub> (msec) | APD <sub>50</sub> (msec) | APA (mV) | MDP (mV) |
|---------------------------|-----|--------------------------|--------------------------|----------|----------|
| IV-17 (Control)           | 71  | 226 ± 9                  | 115 ± 12                 | 109 ± 2  | -60 ± 1  |
| III-3 (Severely affected) | 203 | 271 ± 11                 | 158 ± 14                 | 107 ± 3  | -56 ± 2  |
| IV-15 (Mildly affected)   | 143 | 215 ± 9                  | 132 ± 9                  | 106 ± 2  | -57 ± 1  |
| IV-17 (Control)           | 77  | 184 ± 13                 | 72 ± 6                   | 98 ± 2   | -55 ± 1  |
| IV-3 (Severely affected)  | 134 | 287 ± 17                 | 166 ± 13                 | 106 ± 2  | -56 ± 1  |
| IV-4 (Mildly affected)    | 94  | 169 ± 8                  | 104 ± 8                  | 104 ± 2  | -56 ± 1  |

1 **Supplemental Table 3.** Comprehensive Action Potential Characteristics from Patient Specific  
2 iPSC-CMs from Figure 2. MDP: mean diastolic potential, APD<sub>90</sub>: action potential duration at  
3 90% of repolarization in milliseconds, APD<sub>50</sub>: action potential duration at 50% of depolarization  
4 in milliseconds, APA: action potential amplitude.

5  
6  
7  
8  
9

| iPSC-CM Background        | n  | APD <sub>90</sub> (ms) -nisoldipine | APD <sub>90</sub> (ms) +nisoldipine | p value | APD <sub>50</sub> (ms) -nisoldipine | APD <sub>50</sub> (ms) +nisoldipine | p value | n | I <sub>CaL</sub> (pA/pF) - nisoldipine | I <sub>CaL</sub> (pA/pF) +nisoldipine | p value |
|---------------------------|----|-------------------------------------|-------------------------------------|---------|-------------------------------------|-------------------------------------|---------|---|----------------------------------------|---------------------------------------|---------|
| IV-17 (Control)           | 8  | 229 ± 25                            | 181 ± 20                            | 0.002   | 175 ± 18                            | 132 ± 15                            | 0.008   | 7 | -4.6 ± 0.72                            | -3.4 ± 0.75                           | 0.04    |
| III-3 (Severely affected) | 10 | 305 ± 25                            | 221 ± 20                            | 0.01    | 227 ± 16                            | 158 ± 13                            | 0.002   | 7 | -7.1 ± 0.75                            | -5.2 ± 0.68                           | 0.001   |
| IV-15 (Mildly affected)   | 8  | 211 ± 19                            | 151 ± 16                            | 0.004   | 144 ± 19                            | 96 ± 17                             | 0.003   | 8 | -4.0 ± 0.49                            | -2.9 ± 0.56                           | 0.03    |
| IV-3 (Severely affected)  | 8  | 305 ± 18                            | 178 ± 14                            | 0.006   | 247 ± 13                            | 130 ± 18                            | 0.002   | 6 | -9.0 ± 0.77                            | -5.1 ± 0.66                           | 0.001   |
| IV-4 (Mildly affected)    | 11 | 210 ± 25                            | 157 ± 18                            | 0.0009  | 158 ± 23                            | 106 ± 16                            | 0.01    | 5 | -4.6 ± 0.32                            | -3.0 ± 0.37                           | 0.01    |

1

2 **Supplemental Table 4. Summary data of action potential duration and I<sub>CaL</sub> characteristics**

3 **from patient specific iPSC-CMs with and without nisoldipine treatment** from Figure 5. I<sub>CaL</sub>: L-

4 type Calcium Current. \* denotes significance with p-value assessed by paired Student's t-test (p <

5 0.05 considered significant).

6

**SNPs & Insertion/Deletions in Severely Affected vs. Mildly Affected hERG R752W Mutation Positive Individuals**

| <b>Locus</b>                                                                                 |               |            |                              |                          |            |  |
|----------------------------------------------------------------------------------------------|---------------|------------|------------------------------|--------------------------|------------|--|
| <b>SNPs in Severely Affected hERG R752W Mutation Positive Individuals (III-3 and IV-3)</b>   |               |            |                              |                          |            |  |
|                                                                                              | <b>SNP</b>    | <b>Chr</b> | <b>Nucleotide Change</b>     | <b>Amino Acid Change</b> | <b>MAF</b> |  |
| REM2                                                                                         | rs8014119     | 14         | G287C                        | G96A                     | C = 0.10   |  |
| ARHGAP10                                                                                     | rs115753644   | 4          | G1183A                       | G395R                    | A = 0.0006 |  |
| CAMKK2                                                                                       | rs3817190     | 12         | A253T                        | T85S                     | A = 0.41   |  |
| GRIN3A                                                                                       | rs62000403    | 9          | A3218T                       | N1073I                   | A = 0.05   |  |
| P2RX7                                                                                        | rs2230912     | 12         | A1379G                       | Q460R                    | G = 0.07   |  |
| <b>In/Del in Severely Affected hERG R752W Mutation Positive Individuals (III-3 and IV-3)</b> |               |            |                              |                          |            |  |
|                                                                                              | <b>In/Del</b> | <b>Chr</b> | <b>Type &amp; Nucleotide</b> | <b>Intronic or UTR</b>   | <b>MAF</b> |  |
| DMD                                                                                          | rs3833412     | X          | Insertion of T               | Intronic                 | T: 0.43    |  |
| NRGN                                                                                         | rs11399333    | 11         | Insertion of G               | Intronic                 | G: 0.41    |  |
| PALM2, PALM2-AKAP2                                                                           | rs201053095   | 9          | Insertion of T               | UTR                      | T: 0.02    |  |
| <b>SNPs in Mildly Affected hERG R752W Mutation Positive Individuals (IV-15 and IV-4)</b>     |               |            |                              |                          |            |  |
|                                                                                              | <b>SNP</b>    | <b>Chr</b> | <b>Allele Change</b>         | <b>Amino Acid Change</b> | <b>MAF</b> |  |
| KCNK17                                                                                       | rs10947804    | 6          | A61G                         | S21G                     | A = 0.42   |  |
| PPP1R18                                                                                      | rs9262143     | 6          | C1015A                       | G339R                    | A = 0.02   |  |
| PPP2R3A                                                                                      | rs9814557     | 3          | A200G                        | D67G                     | G = 0.14   |  |
| PLCG1                                                                                        | rs753381      | 20         | T2438C                       | I813T                    | T = 0.27   |  |
| ADCY9                                                                                        | rs2230739     | 16         | A2316G                       | I772M                    | G = 0.26   |  |
| MYO5B                                                                                        | rs2298624     | 18         | G2753A                       | R918H                    | T = 0.14   |  |
| SPTA1                                                                                        | rs857725      | 1          | A5077C                       | K1693Q                   | G = 0.25   |  |
| <b>In/Del in Mildly Affected hERG R752W Mutation Positive Individuals (IV-15 and IV-4)</b>   |               |            |                              |                          |            |  |
|                                                                                              | <b>In/Del</b> | <b>Chr</b> | <b>Type &amp; Nucleotide</b> | <b>Intronic or UTR</b>   | <b>MAF</b> |  |
| KIF1B                                                                                        | rs146553372   | 1          | Deletion of T                | Intronic                 | T: 0.48    |  |

1

2 **Supplemental Table 5.** Exome Sequencing Gene Candidates. This table shows the  
3 complete list of candidate genes identified by exome sequencing in either the severely  
4 affected hERG R752W mutation-positive or mildly affected hERG R752W mutation-  
5 positive individuals. Applying the prioritization strategy shown in Supplemental Figure 2  
6 we identified in the severely affected group SNPs in five genes and three genes with  
7 insertion/deletions. In the mildly affected group, SNPs were identified in seven genes  
8 along with one insertion/deletion. SNP: single nucleotide polymorphism, In/Del:  
9 insertion/deletion, Chr: chromosome, MAF: minor allele frequency (as reported by 1000  
10 Genomes or ExAC Database), UTR: untranslated region.

11

12

| <b>III-3 (Severely affected Homozygous WT:S21)</b> | <b>MDP (mV)</b> | <b>APA (mV)</b> |
|----------------------------------------------------|-----------------|-----------------|
| Scrambled Control (n = 15)                         | -62.52 ± 4.07   | 108.33 ± 2.40   |
| <i>KCNK17</i> siRNA treated (n =15)                | -66.33 ± 4.31   | 105.00 ± 4.49   |
| <b>IV-4 (Mildly affected Heterozygote S21/G21)</b> | <b>MDP (mV)</b> | <b>APA (mV)</b> |
| Scrambled Control (n = 21)                         | -65.27 ± 3.11   | 87.24 ± 2.18    |
| <i>KCNK17</i> siRNA treated (n = 27)               | -61.33 ± 1.59   | 100.26 ± 2.73*  |

1 **Supplemental Table 6.** Additional Action Potential Characteristics from Effects of  
2 *KCNK17* siRNA on patient iPSC-CM (III-3 and IV-4) from Figure 6. Data shown as  
3 mean ± SEM, MDP: mean diastolic potential, APA: action potential amplitude, \*p-  
4 value=0.0008 as determined by unpaired Student's t-test.

5

1

| iPSC-CM Background        | n    | APD <sub>90</sub> (ms)<br>-REM2 siRNA | APD <sub>90</sub> (ms)<br>+REM2 siRNA | p value | APD <sub>50</sub> (ms)<br>-REM2 siRNA | APD <sub>50</sub> (ms)<br>+REM2 siRNA | p value | n   | I <sub>CaL</sub> (pA/pF)<br>REM2 siRNA | I <sub>CaL</sub> (pA/pF)<br>-<br>+REM2 siRNA | p value |
|---------------------------|------|---------------------------------------|---------------------------------------|---------|---------------------------------------|---------------------------------------|---------|-----|----------------------------------------|----------------------------------------------|---------|
| IV-17 (Control)           | 9-10 | 236 ± 23                              | 224 ± 20                              | 0.70    | 181 ± 13                              | 177 ± 20                              | 0.50    | 6-7 | -4.0 ± 0.31                            | -3.9 ± 0.28                                  | 0.61    |
| III-3 (Severely affected) | 10   | 313 ± 22                              | 231 ± 16                              | 0.007   | 248 ± 21                              | 179 ± 14                              | 0.01    | 5-6 | -7.8 ± 0.68                            | -5.1 ± 0.22                                  | 0.02    |
| IV-15 (Mildly affected)   | 9-11 | 228 ± 20                              | 206 ± 28                              | 0.51    | 175 ± 16                              | 153 ± 23                              | 0.44    | 5-6 | -4.4 ± 0.65                            | -2.9 ± 0.31                                  | 0.11    |
| IV-3 (Severely affected)  | 6-7  | 304 ± 43                              | 114 ± 8                               | 0.0006  | 225 ± 42                              | 72 ± 4                                | 0.002   | 5   | -9.2 ± 0.61                            | -3.5 ± 0.58                                  | 0.0002  |
| IV-4 (Mildly affected)    | 10   | 212 ± 16                              | 205 ± 16                              | 0.76    | 151 ± 13                              | 135 ± 15                              | 0.40    | 6-7 | 3.9 ± 0.33                             | -3.4 ± 0.41                                  | 0.51    |

2

3 **Supplemental Table 7. Summary data of action potential and I<sub>CaL</sub> characteristics from**  
4 **patient specific iPSC-CMs - and + *REM2* siRNA** from Supplemental Figure 4. I<sub>CaL</sub>: L-type  
5 Calcium Current. \* denotes significance as assessed by unpaired Student's t-test (p < 0.05  
6 considered significant).

7

| iPSC-CM Background         | n  | APD <sub>90</sub> (ms) | p value  | APD <sub>50</sub> (ms) | p value  | n  | I <sub>CaL</sub> (pA/pF) | p value |
|----------------------------|----|------------------------|----------|------------------------|----------|----|--------------------------|---------|
| IV-3 (Severely Affected)   | 14 | 304 ± 20               | 2.13E-11 | 237 ± 19               | 4.46E-10 | 14 | -8.17 ± 0.72             | 1.6E-6  |
| CRISPR-Cas9 Corrected IV-3 | 37 | 171 ± 13               |          | 137 ± 11               |          | 24 | -4.54 ± 0.67             |         |

1

2 **Supplemental Table 8. Summary data of action potential and I<sub>CaL</sub> characteristics from IV-3**  
3 **patient iPSC-CM - and + CRISPR-Cas9 genome editing** from Figure 7. CRISPR-Cas9 corrected  
4 *REM2* on IV-3 background, I<sub>CaL</sub>: L-type Calcium Current. p-value assessed by unpaired Student's t-  
5 test (p < 0.05 considered significant).

6

7
